# Supplementary material for: Chromatin remodeling of histone H3 variants by DDM1 underlies epigenetic inheritance of DNA methylation
Source: PubMed Central journal article supplement (PMC10529913; doi:10.1016/j.cell.2023.08.001), 2023-08-28

**A**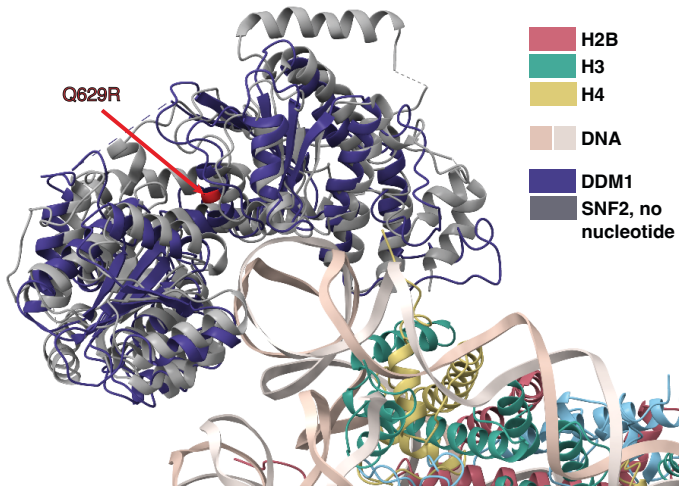**B**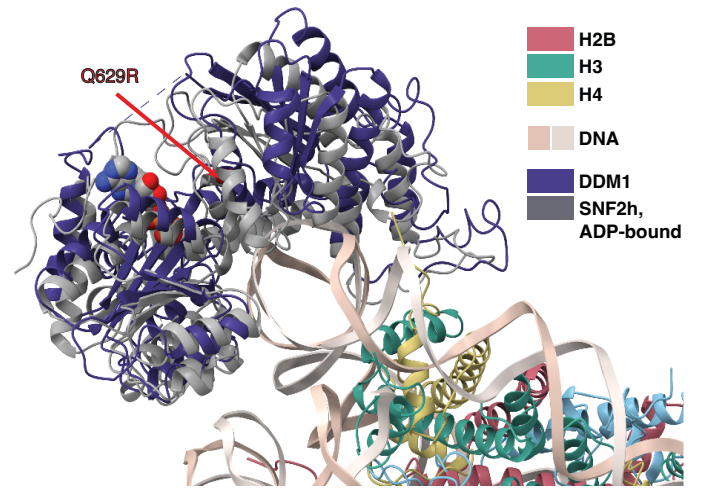**C**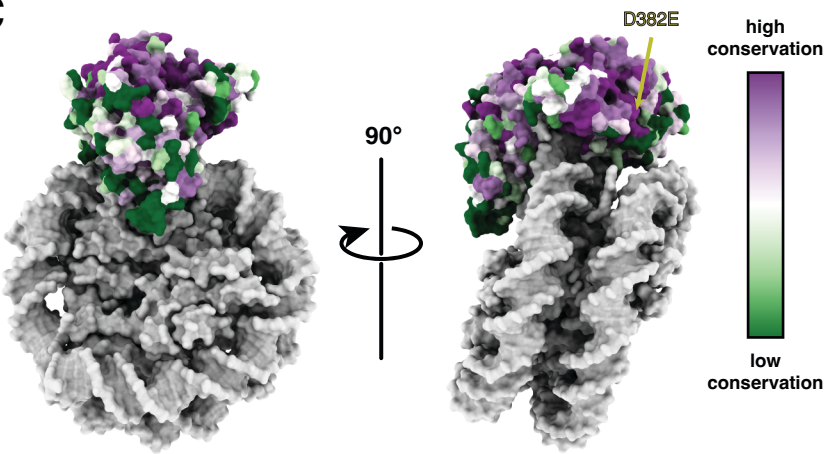**D**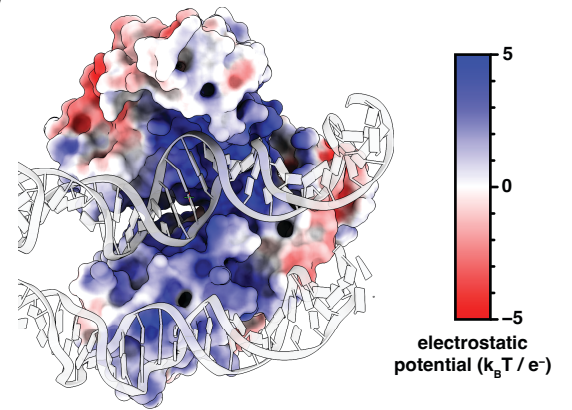**E**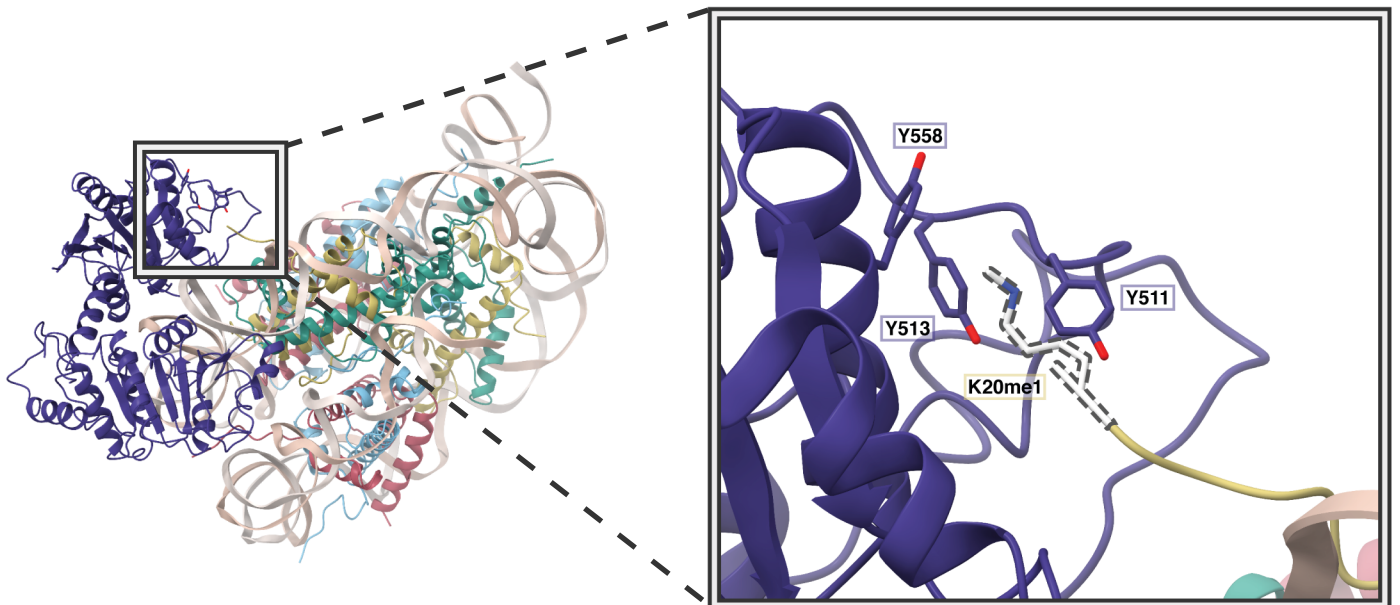

Supplement: NIHMS1922946-supplement-3.pdf [file NIHMS1922946-supplement-3.pdf]
