# Supplementary material for: Chromatin remodeling of histone H3 variants by DDM1 underlies epigenetic inheritance of DNA methylation
Source: PubMed Central journal article supplement (PMC10529913; doi:10.1016/j.cell.2023.08.001), 2023-08-28
Supplement: NIHMS1922946-supplement-8.pdf [file NIHMS1922946-supplement-8.pdf]

**Supplementary Table S2. List of mutants in this study, Related to STAR Methods**

| <b>Mutants</b> | <b>Mutation type</b>              | <b>Notes</b>                                                                                                                  |
|----------------|-----------------------------------|-------------------------------------------------------------------------------------------------------------------------------|
| <i>ddm1-2</i>  | EMS mutant (nucleotide: G to A)   | Hypomorphic; the splicing defect leads to a deletion, a frameshift and premature translation termination; DNA hypomethylation |
| <i>ddm1-10</i> | T-DNA (SALK_093009)               | T-DNA insertion into exon region; used for crossing with MGH3-GFP                                                             |
| <i>met1-1</i>  | EMS mutant (amino acid: P 1300 S) | Hypomorphic; amino acid substitution in catalytic domain; DNA hypomethylation; delayed flowering                              |
| <i>met1-7</i>  | T-DNA (SALK_076522)               | T-DNA insertion into exon region; used for crossing with MGH3-GFP                                                             |
| <i>cmt3-11</i> | EMS mutant                        | Single nucleotide substitution leading to a nonsense mutation; used for crossing with MGH3-GFP                                |
| <i>fas2-4</i>  | T-DNA (SALK_033228)               | Null; no transcript detectable; fasciation                                                                                    |
| <i>hira-1</i>  | WiscDsLox362H05                   | Reduced fertility                                                                                                             |
| <i>atrx-2</i>  | SAIL_861_B04                      | Reduced fertility                                                                                                             |

**Supplementary Table S3. Primer sequences, Related to STAR Methods**

**Cloning primers**

| Name       | Primer sequence (5' to 3')                                 | Locus     | Note                      |
|------------|------------------------------------------------------------|-----------|---------------------------|
| DDM1_attB1 | GGGGACAAGTTTGTACAAAAAAGCAGGCT<br>ATTACTAATTGTGTGACAAATCC   | AT5G66750 | for cloning into pDONR221 |
| DDM1_attB2 | GGGGACCACTTTGTACAAGAAAGCTGGGT<br>AATCCCAAATCCAAAACATAAGATC | AT5G66750 | for cloning into pDONR221 |
| MET1_attB1 | GGGGACAAGTTTGTACAAAAAAGCAGGCT<br>TCATGGTAAAATGTTAGTTCTCG   | AT5G49160 | for cloning into pDONR221 |
| MET1_attB2 | GGGGACCACTTTGTACAAGAAAGCTGGGT<br>CTGGACAACTTTATTTTCGAC     | AT5G49160 | for cloning into pDONR221 |

**Genotyping**

| Name          | Primer sequence (5' to 3')    | Locus     | Note             |
|---------------|-------------------------------|-----------|------------------|
| ddm1-2 CAPS F | GTTGGACAGTGTGGTAAATCCGCT      | AT5G66750 | Rsal digestion   |
| ddm1-2 CAPS R | GAGCTACGAGCCATGGGTTTGTGAAACGT | AT5G66750 | Rsal digestion   |
| ddm1-10 F     | GCAAGCCATGGACAGATGCCACAG      | AT5G66750 |                  |
| ddm1-10 R     | CAGAGGGCCAATTGTTTTCATCAC      | AT5G66750 |                  |
| met1-1 F      | CTCTTTAGTAGAAGTTGGCATG        | AT5G49160 | HaeIII digestion |
| met1-1 R      | ATATGTATGTATAGATATTTTCTCC     | AT5G49160 | HaeIII digestion |
| hira-1 LB     | CTACTAAAATTTGAGGCCGGG         | AT3G44530 |                  |
| hira-1 RB     | GAGAGTCACTGTTTTGGCTGG         | AT3G44530 |                  |
| atr-2 LB      | AGGAACCCTCACAGCTTCTTC         | AT1G08600 |                  |
| atr-2 RB      | TCACATGGATGGCTTCTTTTC         | AT1G08600 |                  |
| HTR3-GFP-F    | TAGTGCAGTCGCAGCTCTTC          | AT3G27360 |                  |
| HTR3-GFP-R    | TTTGTACAAGAAAGCTGGGTCAG       | AT3G27360 |                  |

**McrBC-qPCR**

| Name        | Primer sequence (5' to 3') | Locus     | Note |
|-------------|----------------------------|-----------|------|
| ATGP1 F     | CGAATGAATCCCTTACCCAAC      | AT2G01022 |      |
| ATGP1 R     | AGCGACATTCGGGAGGAT         | AT2G01022 |      |
| ATHILA2_1 F | ACCAAGCCGAGTACAACCATAT     | AT5G33257 |      |
| ATHILA2_1 R | CATTGTGCTCGAGTGTCTGG       | AT5G33257 |      |
| ATHILA2_2 F | TGCTAGATCGAGTGAGTGTCGT     | AT5G35057 |      |
| ATHILA2_2 R | CCGAGCCTAGAGAGCAGAAG       | AT5G35057 |      |

**ChIP-qPCR and RT-qPCR**

| Name        | Primer sequence (5' to 3') | Locus     | Note |
|-------------|----------------------------|-----------|------|
| TSI F       | ATCCAGTCCGAAGAACGCGAACTA   |           |      |
| TSI R       | TCACTTGTGAGTGTTCTGTGAGGTC  |           |      |
| Ta3 F       | AAGAGAGCTGGCAGAAGCAGTTGA   | AT1G37110 |      |
| Ta3 R       | ACGCCCTTTACCTTGACCTCCTTT   | AT1G37110 |      |
| ATHILA6A F  | ACAGGAAGTGGGCGCACACC       | AT5G32511 |      |
| ATHILA6A R  | CTCACAAACGACGCAAGTGATCT    | AT5G32511 |      |
| ATHILA2_1 F | ACCAAGCCGAGTACAACCATAT     | AT5G33257 |      |
| ATHILA2_1 R | CATTGTGCTCGAGTGTCTGG       | AT5G33257 |      |
| ATHILA2_2 F | TGCTAGATCGAGTGAGTGTCGT     | AT5G35057 |      |
| ATHILA2_2 R | CCGAGCCTAGAGAGCAGAAG       | AT5G35057 |      |

**ATPase assay substrates**

| Name            | Primer sequence (5' to 3')   | Locus | Note |
|-----------------|------------------------------|-------|------|
| Widom601 0N60 F | AGAGTGGGAGCTCGGAACACTATCCGAC |       |      |
| Widom601 0N60 R | CTGGAGAATCCCGGTGCC           |       |      |

Supplementary Table S4. ChIP and Bisulfite-sequencing libraries metrics, related to STAR Methods.

| Genotype        | Sample   | Group | Replicate | Total reads | All mapped reads | (% total) | Uniquely mapped reads | (% total) | Cytosines covered (WGBS only) | Average coverage (WGBS only) | Non conversion rate (% mC/C in Pt) (WGBS only) |
|-----------------|----------|-------|-----------|-------------|------------------|-----------|-----------------------|-----------|-------------------------------|------------------------------|------------------------------------------------|
| WT              | WGBS     | A     | Rep1      | 32,230,036  | 30,942,651       | 96.01%    | 24,745,052            | 76.78%    | 90.41%                        | 8.17                         | 0.269861                                       |
| WT              | WGBS     | A     | Rep2      | 53,613,049  | 52,389,181       | 97.72%    | 42,053,916            | 78.44%    | 88.18%                        | 6.78                         | 0.51281                                        |
| <i>hira</i>     | WGBS     | A     | Rep1      | 17,362,101  | 16,566,981       | 95.42%    | 12,957,483            | 74.63%    | 77.90%                        | 3.93                         | 0.270725                                       |
| <i>hira</i>     | WGBS     | A     | Rep2      | 44,991,888  | 42,569,624       | 94.62%    | 33,798,990            | 75.12%    | 78.21%                        | 3.22                         | 0.706732                                       |
| <i>ddm1hira</i> | WGBS     | A     | Rep1      | 21,758,809  | 17,461,284       | 80.25%    | 13,837,031            | 63.59%    | 77.38%                        | 3.94                         | 0.287453                                       |
| <i>ddm1hira</i> | WGBS     | A     | Rep2      | 48,425,900  | 36,805,003       | 76.00%    | 28,725,572            | 59.32%    | 84.11%                        | 6.16                         | 0.548739                                       |
| <i>ddm1</i>     | WGBS     | A     | Rep1      | 27,502,435  | 26,294,284       | 95.61%    | 20,404,561            | 74.19%    | 83.48%                        | 5.30                         | 0.266461                                       |
| <i>ddm1</i>     | WGBS     | A     | Rep2      | 37,878,589  | 37,470,061       | 98.92%    | 29,204,434            | 77.10%    | 83.05%                        | 6.49                         | 0.537523                                       |
| WT              | WGBS     | B     | Rep1      | 30,561,004  | 24,364,737       | 79.72%    | 18,151,083            | 59.39%    | 77.57%                        | 7.07                         | 0.589116                                       |
| WT              | WGBS     | B     | Rep2      | 34,550,917  | 30,417,035       | 88.04%    | 22,452,116            | 64.98%    | 79.20%                        | 9.83                         | 0.587723                                       |
| <i>ddm1atrx</i> | WGBS     | B     | Rep1      | 23,525,857  | 19,197,760       | 81.60%    | 14,136,528            | 60.09%    | 71.88%                        | 6.43                         | 0.595414                                       |
| <i>ddm1atrx</i> | WGBS     | B     | Rep2      | 37,170,647  | 35,040,723       | 94.27%    | 24,906,077            | 67.00%    | 79.15%                        | 10.33                        | 0.667431                                       |
| <i>ddm1</i>     | WGBS     | B     | Rep1      | 36,520,861  | 35,544,986       | 97.33%    | 26,379,181            | 72.23%    | 78.73%                        | 7.54                         | 0.621665                                       |
| <i>ddm1</i>     | WGBS     | B     | Rep2      | 20,358,084  | 19,257,875       | 94.60%    | 14,528,944            | 71.37%    | 73.49%                        | 4.70                         | 0.923219                                       |
| <i>atrx</i>     | WGBS     | B     | Rep1      | 39,661,456  | 39,246,987       | 98.95%    | 29,154,984            | 73.51%    | 79.63%                        | 5.21                         | 0.845968                                       |
| <i>atrx</i>     | WGBS     | B     | Rep2      | 38,694,008  | 38,125,949       | 98.53%    | 28,077,230            | 72.56%    | 79.89%                        | 6.57                         | 0.661121                                       |
| WT              | DDM1     | IP    | Rep1      | 40,515,724  | 37,212,763       | 91.85%    | 21,468,053            | 52.99%    | -                             | -                            | -                                              |
| WT              | DDM1     | Input | Rep1      | 47,290,771  | 45,973,121       | 97.21%    | 32,105,406            | 67.89%    | -                             | -                            | -                                              |
| WT              | DDM1     | IP    | Rep2      | 34,645,829  | 32,569,880       | 94.01%    | 19,276,714            | 55.64%    | -                             | -                            | -                                              |
| WT              | DDM1     | Input | Rep2      | 51,279,688  | 49,817,225       | 97.15%    | 34,561,985            | 67.40%    | -                             | -                            | -                                              |
| <i>ddm1</i>     | DDM1     | IP    | Rep1      | 50,102,086  | 47,183,497       | 94.17%    | 27,125,034            | 54.14%    | -                             | -                            | -                                              |
| <i>ddm1</i>     | DDM1     | Input | Rep1      | 39,982,483  | 39,028,473       | 97.61%    | 26,984,304            | 67.49%    | -                             | -                            | -                                              |
| <i>ddm1</i>     | DDM1     | IP    | Rep2      | 49,577,213  | 43,872,422       | 88.49%    | 24,804,809            | 50.03%    | -                             | -                            | -                                              |
| <i>ddm1</i>     | DDM1     | Input | Rep2      | 33,380,544  | 32,612,138       | 97.70%    | 22,752,619            | 68.16%    | -                             | -                            | -                                              |
| WT              | H3K27me1 | IP    | Rep1      | 30,078,663  | 29,656,796       | 98.60%    | 11,522,922            | 38.31%    | -                             | -                            | -                                              |
| WT              | H3K27me1 | H3    | Rep1      | 22,622,734  | 22,483,854       | 99.39%    | 16,142,362            | 71.35%    | -                             | -                            | -                                              |
| WT              | H3K27me1 | IP    | Rep2      | 50,994,633  | 40,503,003       | 79.43%    | 13,950,016            | 27.36%    | -                             | -                            | -                                              |
| WT              | H3K27me1 | H3    | Rep2      | 60,442,954  | 59,862,967       | 99.04%    | 45,680,564            | 75.58%    | -                             | -                            | -                                              |
| <i>ddm1</i>     | H3K27me1 | IP    | Rep1      | 26,031,998  | 25,885,357       | 99.44%    | 18,435,013            | 70.81%    | -                             | -                            | -                                              |
| <i>ddm1</i>     | H3K27me1 | H3    | Rep1      | 28,806,975  | 28,258,079       | 98.09%    | 10,926,824            | 37.93%    | -                             | -                            | -                                              |
| <i>ddm1</i>     | H3K27me1 | IP    | Rep2      | 37,494,713  | 28,836,811       | 76.91%    | 9,554,115             | 25.48%    | -                             | -                            | -                                              |
| <i>ddm1</i>     | H3K27me1 | H3    | Rep2      | 52,356,409  | 51,800,730       | 98.94%    | 38,115,613            | 72.80%    | -                             | -                            | -                                              |
| WT              | H4K16ac  | IP    | Rep1      | 29,867,512  | 29,113,254       | 97.47%    | 19,477,351            | 65.21%    | -                             | -                            | -                                              |
| WT              | H4K16ac  | H4    | Rep1      | 32,025,461  | 31,151,067       | 97.27%    | 17,149,656            | 53.55%    | -                             | -                            | -                                              |
| WT              | H4K16ac  | IP    | Rep2      | 49,958,674  | 48,846,091       | 97.77%    | 33,687,425            | 67.43%    | -                             | -                            | -                                              |
| WT              | H4K16ac  | H4    | Rep2      | 49,482,528  | 48,239,575       | 97.49%    | 26,621,503            | 53.80%    | -                             | -                            | -                                              |
| <i>ddm1</i>     | H4K16ac  | IP    | Rep1      | 44,578,514  | 43,566,178       | 97.73%    | 28,553,612            | 64.05%    | -                             | -                            | -                                              |
| <i>ddm1</i>     | H4K16ac  | H4    | Rep1      | 59,698,668  | 20,431,979       | 34.23%    | 12,114,825            | 20.29%    | -                             | -                            | -                                              |
| <i>ddm1</i>     | H4K16ac  | IP    | Rep2      | 40,697,481  | 39,804,154       | 97.81%    | 26,494,041            | 65.10%    | -                             | -                            | -                                              |
| <i>ddm1</i>     | H4K16ac  | H4    | Rep2      | 33,698,770  | 32,821,242       | 97.40%    | 17,607,160            | 52.25%    | -                             | -                            | -                                              |
| WT              | HTR5     | IP    | Rep1      | 89,816,986  | 89,262,349       | 99.38%    | 74,274,600            | 82.70%    | -                             | -                            | -                                              |
| WT              | HTR5     | H3    | Rep1      | 43,362,049  | 42,608,947       | 98.26%    | 33,866,720            | 78.10%    | -                             | -                            | -                                              |
| WT              | HTR5     | IP    | Rep2      | 47,569,522  | 47,259,571       | 99.35%    | 40,618,380            | 85.39%    | -                             | -                            | -                                              |
| WT              | HTR5     | H3    | Rep2      | 62,187,338  | 61,578,996       | 99.02%    | 46,846,643            | 75.33%    | -                             | -                            | -                                              |
| <i>ddm1</i>     | HTR5     | IP    | Rep1      | 91,478,171  | 90,971,481       | 99.45%    | 68,533,360            | 74.92%    | -                             | -                            | -                                              |
| <i>ddm1</i>     | HTR5     | H3    | Rep1      | 43,901,988  | 43,551,892       | 99.20%    | 31,424,017            | 71.58%    | -                             | -                            | -                                              |
| <i>ddm1</i>     | HTR5     | IP    | Rep2      | 88,251,305  | 87,728,045       | 99.41%    | 67,051,725            | 75.98%    | -                             | -                            | -                                              |
| <i>ddm1</i>     | HTR5     | H3    | Rep2      | 77,052,248  | 76,533,910       | 99.33%    | 51,185,737            | 66.43%    | -                             | -                            | -                                              |
| WT              | MGH3     | IP    | Rep1      | 114,691,469 | 110,674,811      | 96.50%    | 97,134,182            | 84.69%    | -                             | -                            | -                                              |
| WT              | MGH3     | Input | Rep1      | 42,239,090  | 39,899,471       | 94.46%    | 25,189,691            | 59.64%    | -                             | -                            | -                                              |
| <i>ddm1/+</i>   | MGH3     | IP    | Rep1      | 28,958,163  | 23,043,589       | 79.58%    | 17,882,624            | 61.75%    | -                             | -                            | -                                              |
| <i>ddm1/+</i>   | MGH3     | Input | Rep1      | 25,645,477  | 24,623,469       | 96.01%    | 14,422,150            | 56.24%    | -                             | -                            | -                                              |

**Supplementary Table S5. Cryo-EM data collection and reconstruction statistics for the DDM1-nucleosome complex, Related to STAR Methods**

| <b>Data collection</b>                                              |              |
|---------------------------------------------------------------------|--------------|
| <i>Microscope</i>                                                   | Titan Krios  |
| <i>Voltage (keV)</i>                                                | 300          |
| <i>Magnification</i>                                                | 81,000x      |
| <i>Defocus range (<math>\mu\text{m}</math>)</i>                     | -1.0 to -2.2 |
| <i>Detector</i>                                                     | K3           |
| <i>Pixel Size (<math>\text{\AA}</math>)</i>                         | 1.1          |
| <i>Total exposure (<math>e^- / \text{\AA}^2</math>)</i>             | 71.2         |
| <i>Exposure rate (<math>e^- / \text{\AA}^2 / \text{sec}</math>)</i> | 14.8         |
| <i>Exposure per frame (<math>e^- / \text{\AA}^2</math>)</i>         | 2.37         |
| <i>Micrographs collected</i>                                        | 8,165        |

| <b>Initial processing</b> |           |
|---------------------------|-----------|
| <i>Micrographs used</i>   | 7,811     |
| <i>Initial particles</i>  | 3,788,872 |

| <b>Reconstruction</b>                                      |           |
|------------------------------------------------------------|-----------|
| <i>Final particles</i>                                     | 215,066   |
| <i>Symmetry</i>                                            | C1        |
| <i>Map sharpening B-factor (<math>\text{\AA}^2</math>)</i> | 57.8      |
| <i>Half maps resolution (unmasked / masked)</i>            |           |
| FSC 0.143                                                  | 3.4 / 3.2 |

**Supplementary Table S6. Model refinement and validation statistics for the DDM1-nucleosome complex, Related to STAR Methods**

Statistics are provided for the full model as well as the individual octamer, DNA and DDM1 components.

| <b>Refinement</b>                                   | <b>Full model</b>       | <b>Octamer</b>         | <b>DNA</b>          | <b>DDM1</b>            |
|-----------------------------------------------------|-------------------------|------------------------|---------------------|------------------------|
| <i>Protein residues</i>                             | 1217                    | 749                    | —                   | 468                    |
| <i>Nucleic acid residues</i>                        | 282                     | —                      | 282                 | —                      |
| <i>Model resolution (unmasked / masked)</i>         |                         |                        |                     |                        |
| FSC 0.5                                             | 3.2 / 3.2               |                        |                     |                        |
| FSC 0.143                                           | 2.8 / 2.8               |                        |                     |                        |
| <i>Map correlation coefficients</i>                 |                         |                        |                     |                        |
| CC mask                                             | 0.74                    | 0.78                   | 0.73                | 0.6                    |
| CC box                                              | 0.65                    | —                      | —                   | —                      |
| CC peaks                                            | 0.65                    | —                      | —                   | —                      |
| CC volume                                           | 0.72                    | 0.73                   | 0.72                | 0.58                   |
| <b>Model geometry</b>                               |                         |                        |                     |                        |
| <i>Ramachandran plot</i>                            |                         |                        |                     |                        |
| Outliers (%)                                        | 0                       | 0                      | —                   | 0                      |
| Allowed (%)                                         | 0.67                    | 0                      | —                   | 1.72                   |
| Favored (%)                                         | 99.33                   | 100                    | —                   | 98.28                  |
| <i>Ramachandran plot Z-score</i>                    |                         |                        |                     |                        |
| Whole                                               | -0.32 ± 0.23 (N = 1197) | 0.18 ± 0.30 (N = 733)  | —                   | -1.11 ± 0.36 (N = 464) |
| Helix                                               | 0.25 ± 0.19 (N = 681)   | 0.72 ± 0.23 (N = 492)  | —                   | -0.96 ± 0.34 (N = 189) |
| Sheet                                               | 1.72 ± 0.73 (N = 55)    | —                      | —                   | 1.72 ± 0.73 (N = 55)   |
| Loop                                                | -1.05 ± 0.26 (N = 461)  | -1.00 ± 0.36 (N = 241) | —                   | -1.10 ± 0.38 (N = 220) |
| <i>CaBLAM outliers (%)</i>                          | 0.4                     | 0.3                    | —                   | 0.7                    |
| <i>Rotamers</i>                                     |                         |                        |                     |                        |
| Poor (%)                                            | 0.1                     | 0                      | —                   | 0.24                   |
| Favored (%)                                         | 98.28                   | 98.72                  | —                   | 97.62                  |
| <i>R.M.S. deviations</i>                            |                         |                        |                     |                        |
| Bond lengths (Å)                                    | 0.004                   | 0.004                  | 0.004               | 0.004                  |
| Bond angles (°)                                     | 0.759                   | 0.757                  | 0.716               | 0.837                  |
| <i>Geometry outliers</i>                            |                         |                        |                     |                        |
| C <sub>α</sub> deviations (%)                       | 0.08                    | 0                      | —                   | 0.22                   |
| C <sub>β</sub> deviations                           | 0                       | 0                      | —                   | 0                      |
| Bad bonds                                           | 0 / 9,894               | 0 / 5,991              | 0 / 6,484           | 0 / 3,903              |
| Bad angles                                          | 0 / 13,296              | 0 / 8,040              | 0 / 10,003          | 0 / 5,256              |
| Cis prolines                                        | 0 / 39                  | 0 / 24                 | —                   | 0 / 15                 |
| Chiral volume outliers                              | 0 / 2633                | 0 / 931                | 0 / 1,128           | 0 / 574                |
| <i>Clashscore (all atoms)</i>                       | 3.22                    | 1.97                   | 2.79                | 5.57                   |
| <i>MolProbity score</i>                             | 1.11                    | 0.96                   | —                   | 1.3                    |
| <i>B-factors (Å<sup>2</sup>) (min / max / mean)</i> |                         |                        |                     |                        |
| Protein                                             | 12.6 / 98.4 / 45.8      | 12.6 / 93.9 / 30.7     | —                   | 36.1 / 98.4 / 69.2     |
| Nucleotide                                          | 28.84 / 201.26 / 87.65  | —                      | 28.8 / 201.3 / 87.7 | —                      |
